# Supplementary material
Source: PubMed Central journal article supplement (PMC4794388)

**Supplementary Table S1.** Relationship between expression of AKT1,  $\beta$ -TrCP, Twist1, and E-cadherin in surgical specimens of breast cancer.

|                                |            | <b>AKT1 Expression</b> |           |            | <b>Total</b> | <b>P value</b>    |
|--------------------------------|------------|------------------------|-----------|------------|--------------|-------------------|
|                                |            | <b>-/+</b>             | <b>++</b> | <b>+++</b> |              |                   |
| <b><math>\beta</math>-TrCP</b> | <b>-/+</b> | 15(14.4%)              | 8(7.7%)   | 1(1.0%)    | 24(23.1%)    |                   |
|                                | <b>++</b>  | 7(6.7%)                | 17(16.3%) | 5(4.8%)    | 29(27.9%)    |                   |
|                                | <b>+++</b> | 1(1.0%)                | 8(7.7%)   | 42(40.4%)  | 51(49.0%)    |                   |
| <b>Total</b>                   |            | 23(22.1%)              | 33(31.7%) | 48(46.2%)  | 104(100%)    | <b>P = 0.0001</b> |
| <b>Twist1</b>                  | <b>-/+</b> | 6(5.8%)                | 9(8.7%)   | 13(12.6%)  | 28(27.2%)    |                   |
|                                | <b>++</b>  | 21(20.4%)              | 3(2.9%)   | 17(16.5%)  | 41(39.8%)    |                   |
|                                | <b>+++</b> | 18(17.5%)              | 7(6.8%)   | 9(8.7%)    | 34(33.0%)    |                   |
| <b>Total</b>                   |            | 45(43.7%)              | 19(18.4%) | 39(37.9%)  | 103(100%)    | <b>P = 0.018</b>  |
| <b>E-cad</b>                   | <b>-/+</b> | 12(14.5%)              | 7(8.4%)   | 3(3.6%)    | 22(26.5%)    |                   |
|                                | <b>++</b>  | 5(6.0%)                | 9(10.8%)  | 14(16.9%)  | 28(33.7%)    |                   |
|                                | <b>+++</b> | 4(4.8%)                | 10(12%)   | 19(22.9%)  | 33(39.8%)    |                   |
| <b>Total</b>                   |            | 21(25.3%)              | 26(31.3%) | 36(43.4%)  | 83(100%)     | <b>P = 0.002</b>  |

Pearson chi-square test was used to evaluate the correlation between AKT-1,  $\beta$ -TrCP, E-Cadherin, and Twist (SPSS software). A P value < 0.05 was set as the criterion for statistical significance. E-cad, E-cadherin.

**Supplementary Table S2.** Antibodies used in Western blotting and immunoprecipitation.

| <b>Antibody</b>           | <b>Company</b>            | <b>Catalog Number</b> |
|---------------------------|---------------------------|-----------------------|
| Flag                      | Sigma                     | F3165                 |
| HA                        | Roche                     | 11666606001           |
| Twist                     | Santa Cruz Biotechnology  | C-19                  |
| AKT1                      | Cell Signaling Technology | 2938                  |
| p-(Ser/Thr) AKT substrate | Cell Signaling Technology | 9611                  |
| p-RxRxxS/T                | Cell Signaling Technology | 9614                  |
| p-AKT(S473)               | Cell Signaling Technology | 9271                  |
| E-cadherin                | BD Biosciences            | 610405                |
| $\alpha$ -catenin         | BD Biosciences            | 610194                |
| N-cadherin                | BD Biosciences            | 610921                |
| fibronectin               | BD Biosciences            | 610077                |
| vimentin                  | Santa Cruz Biotechnology  | 10AG2                 |
| $\alpha$ -tubulin         | Santa Cruz Biotechnology  | B-5-1-2               |
| ubiquitin                 | Santa Cruz Biotechnology  | P4D1                  |
| HRP anti-Mouse IgG        | e Bioscience              | 18-8877-31            |
| HRP anti-Rabbit IgG       | e Bioscience              | 18-8816-31            |

# Supplementary Figure S1

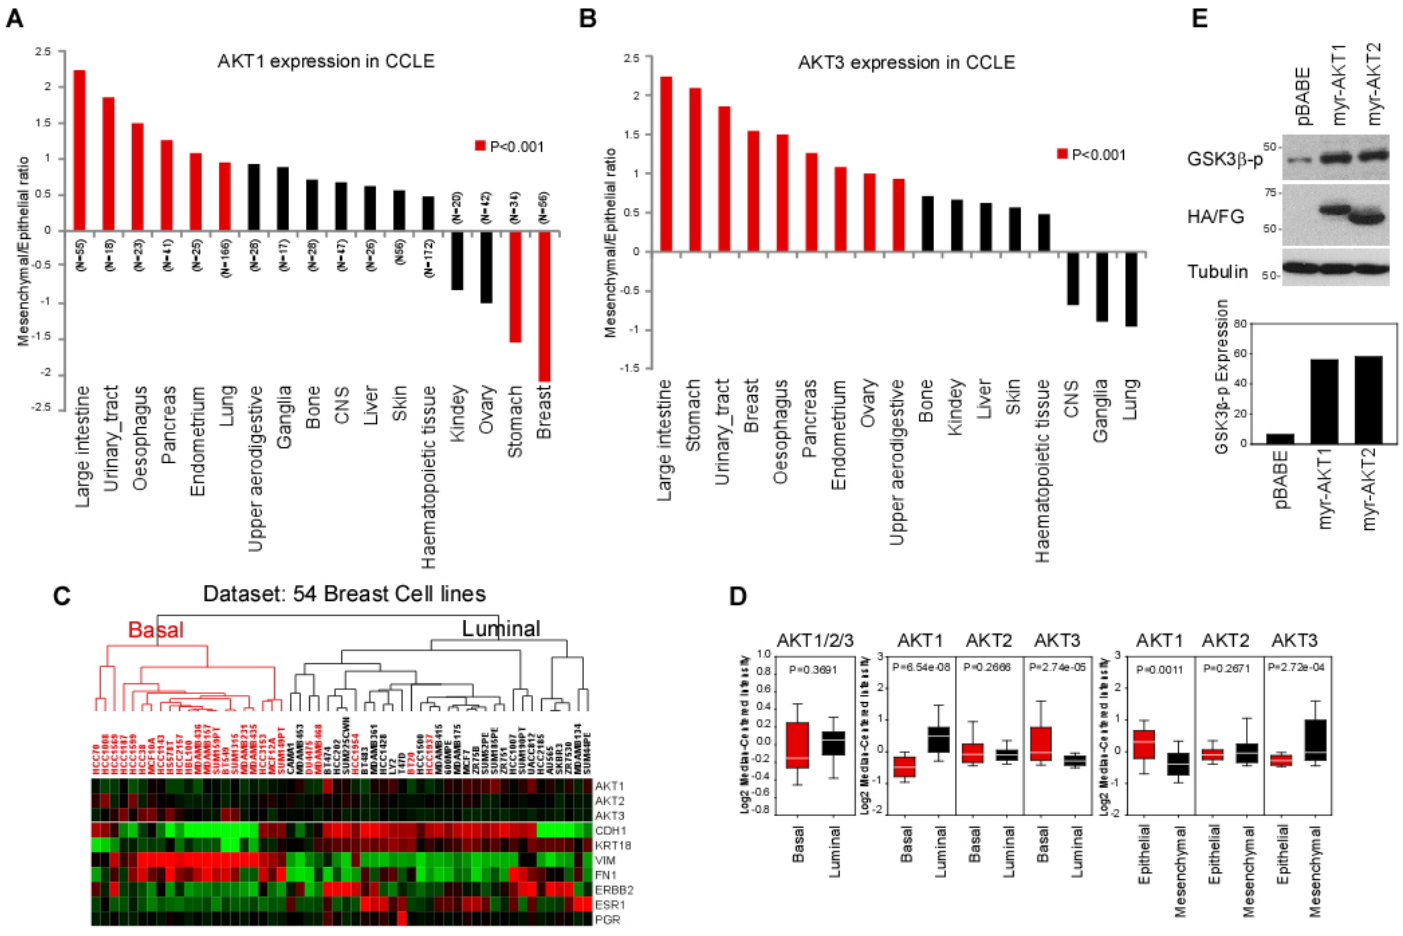

## Supplementary Figure S2

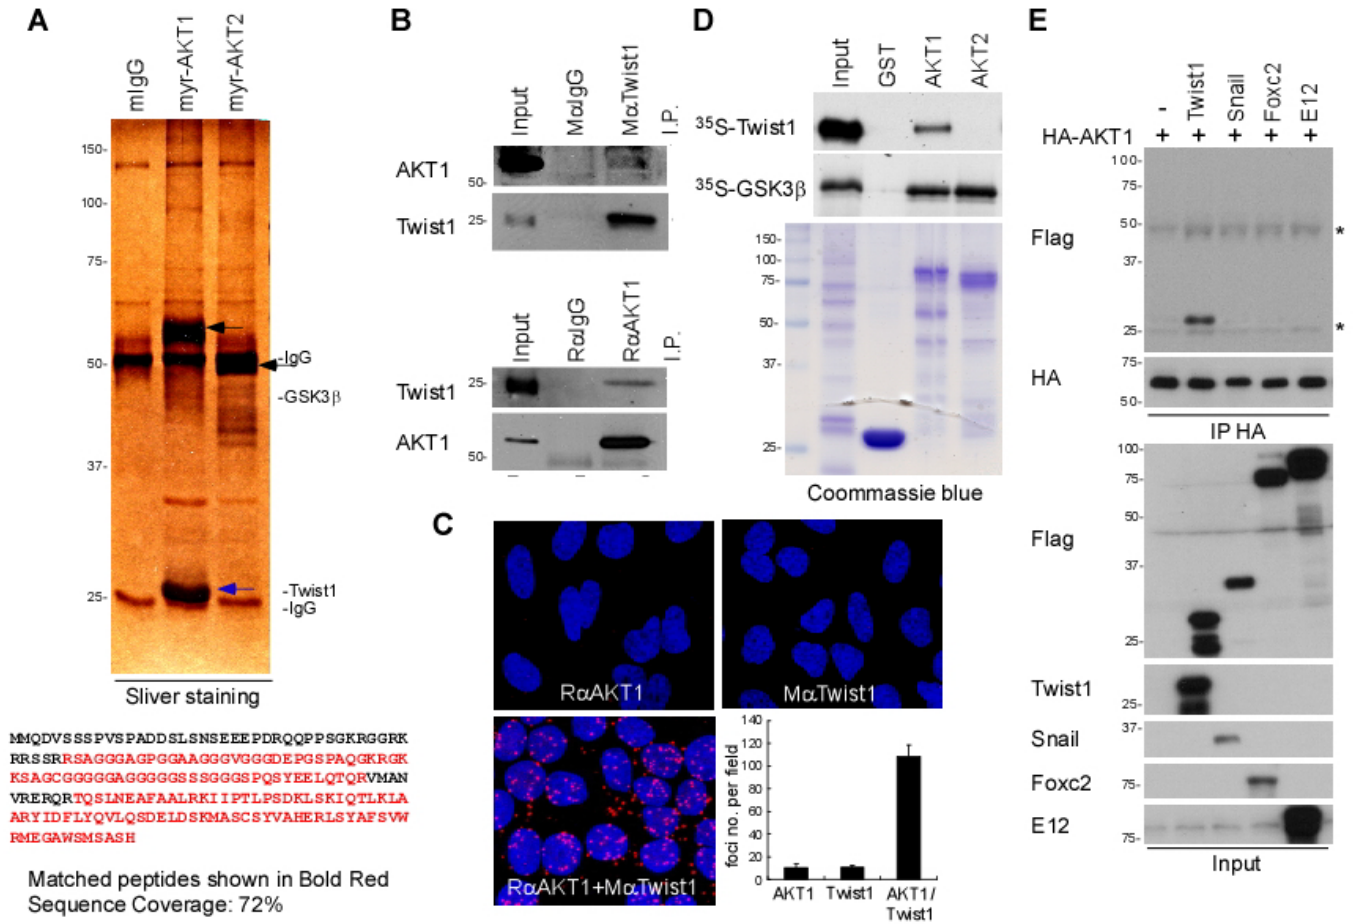

Supplementary Figure S3

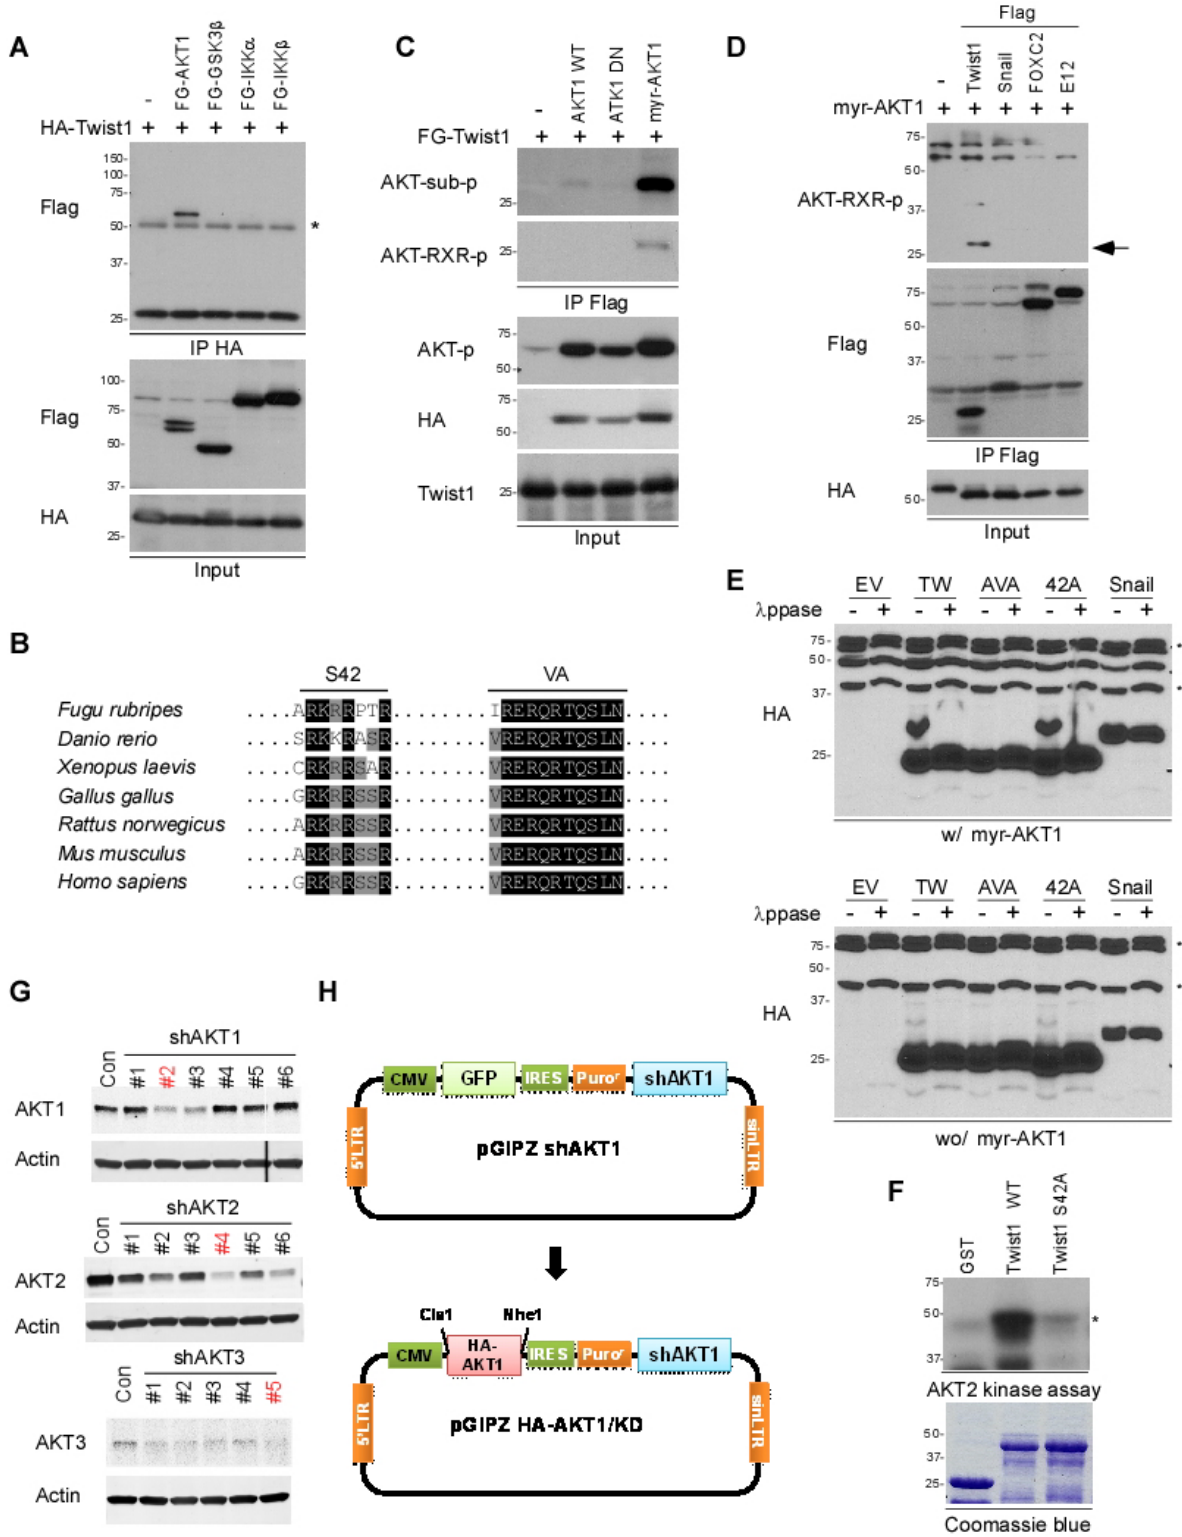

Supplementary Figure S4

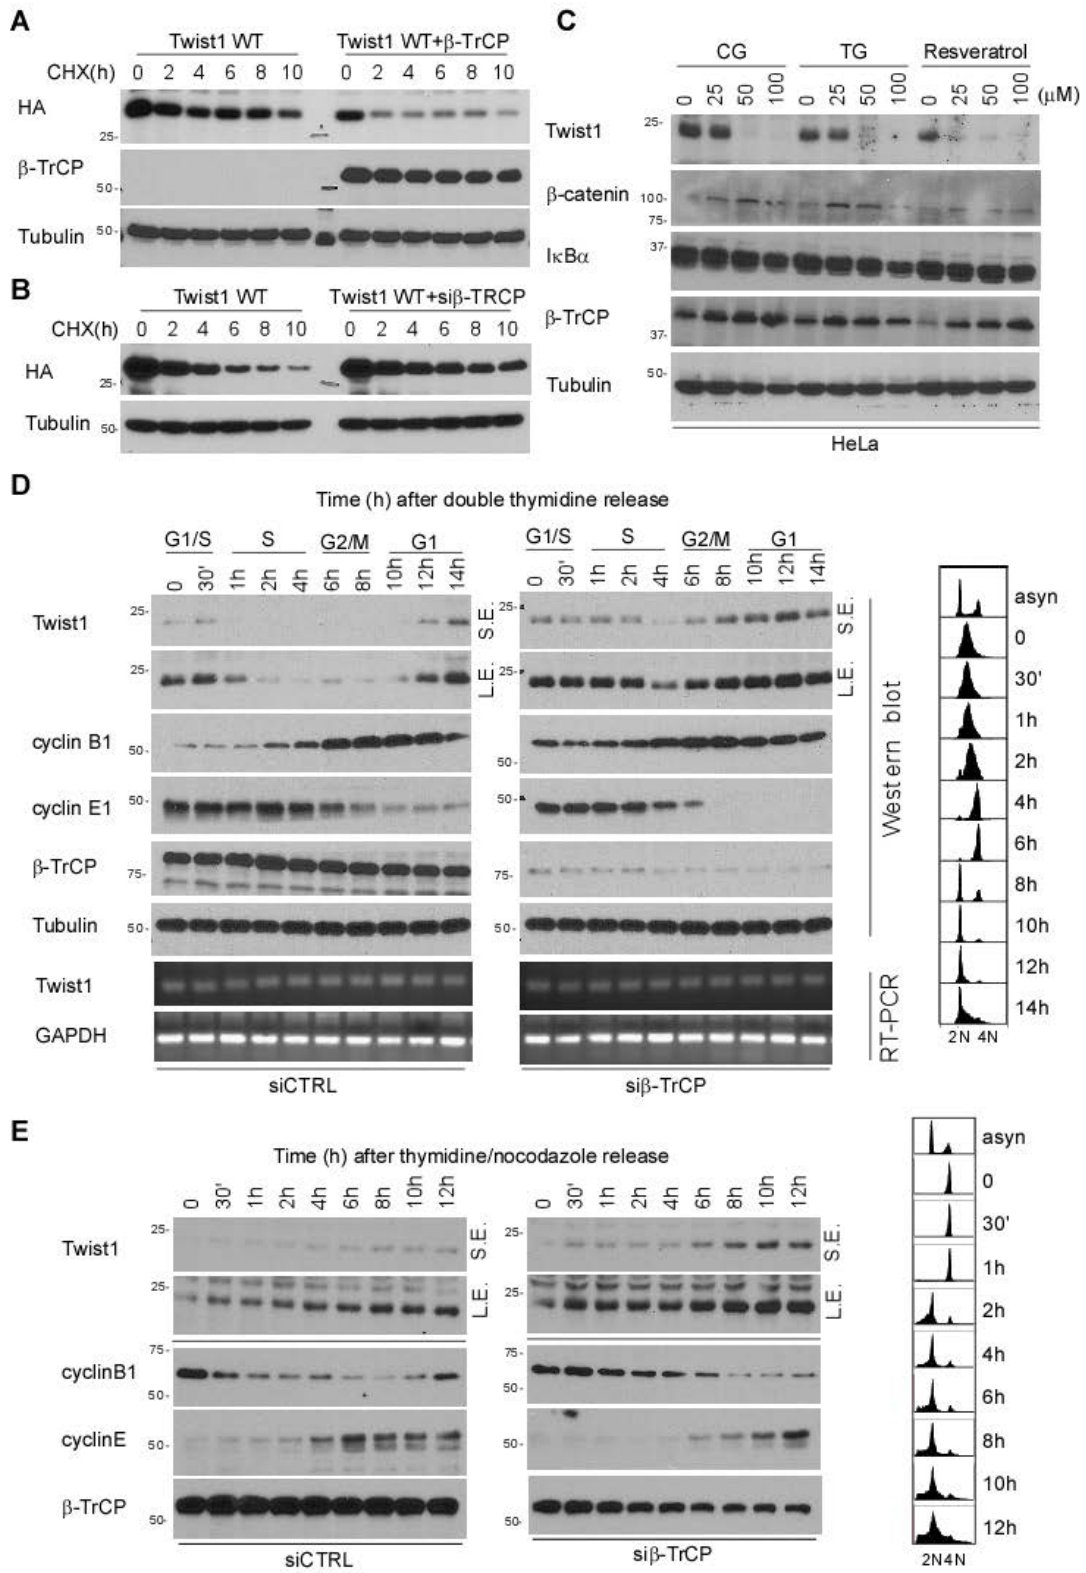

## Supplementary Figure S5

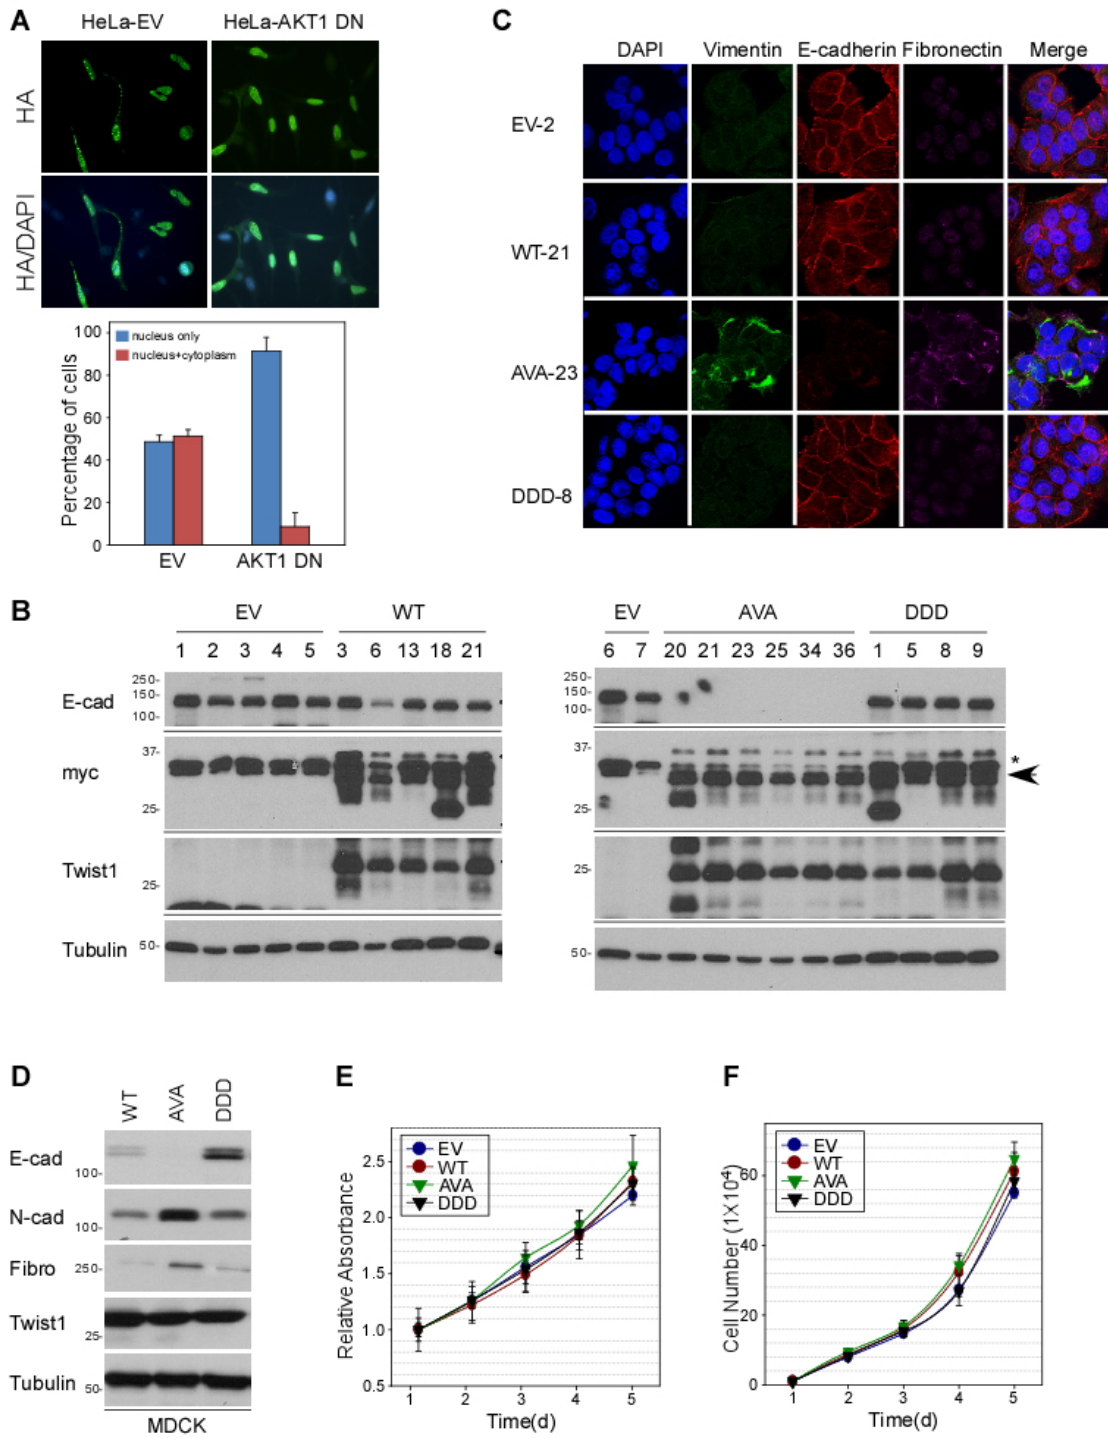

Supplementary Figure S6

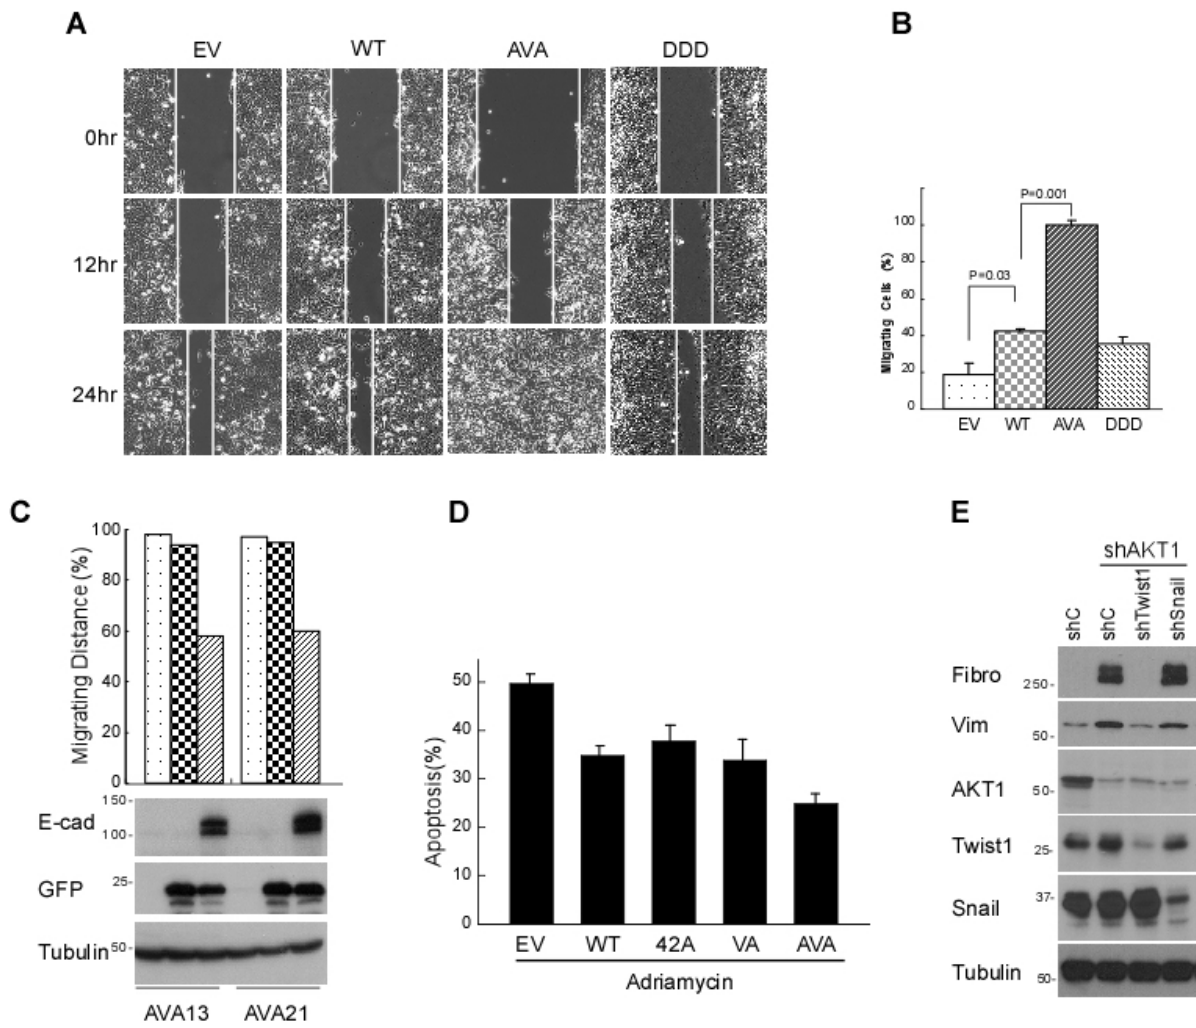



**Supplementary Figure S7**

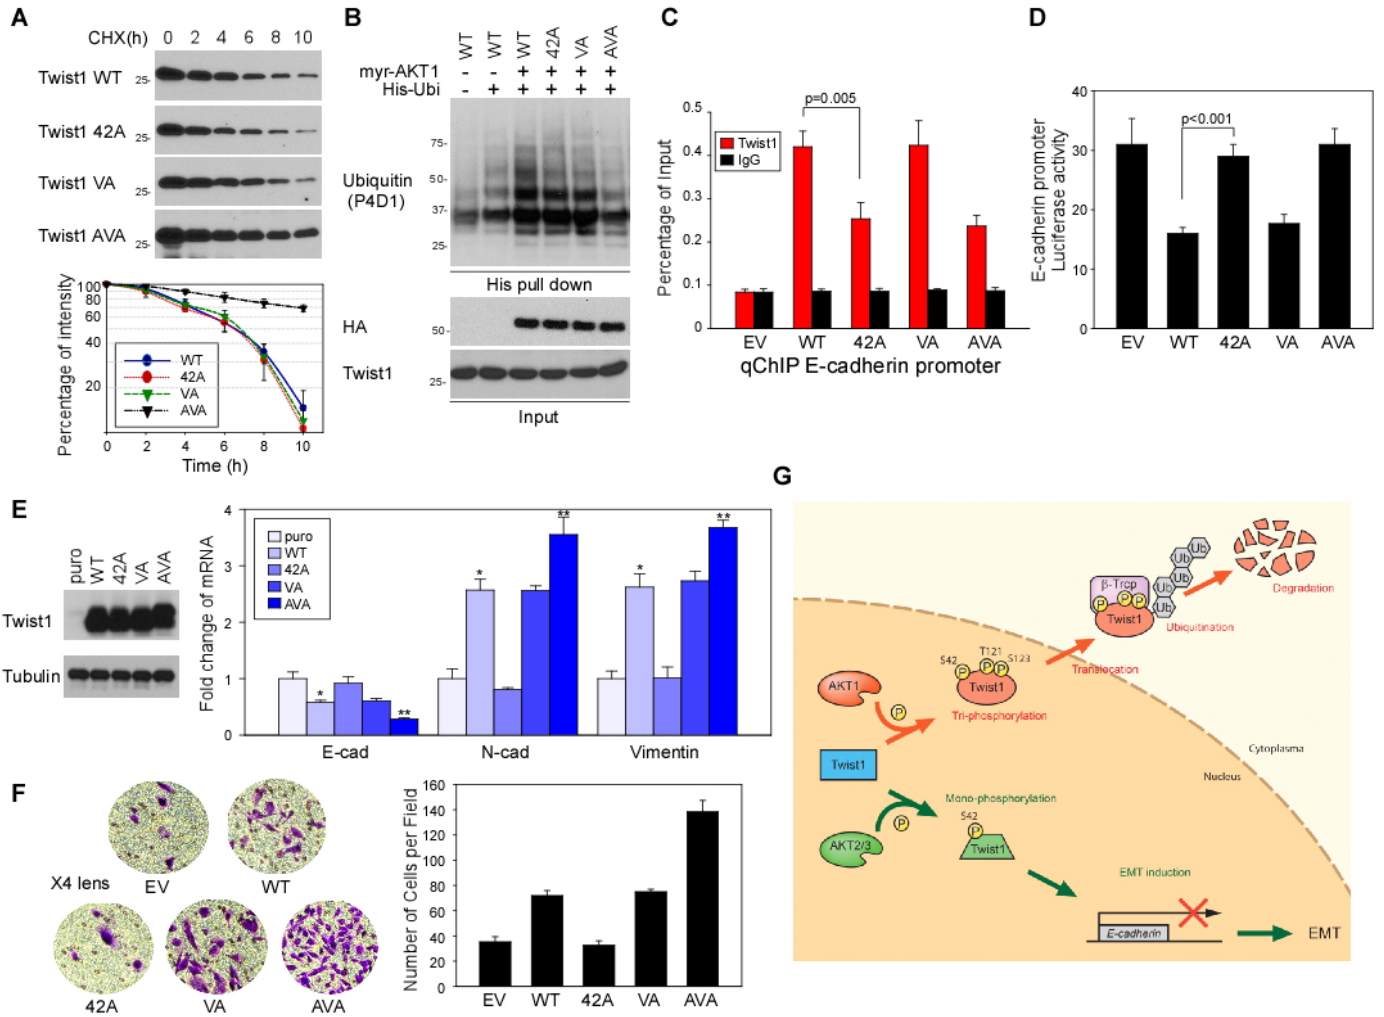

Supplementary Figure S8

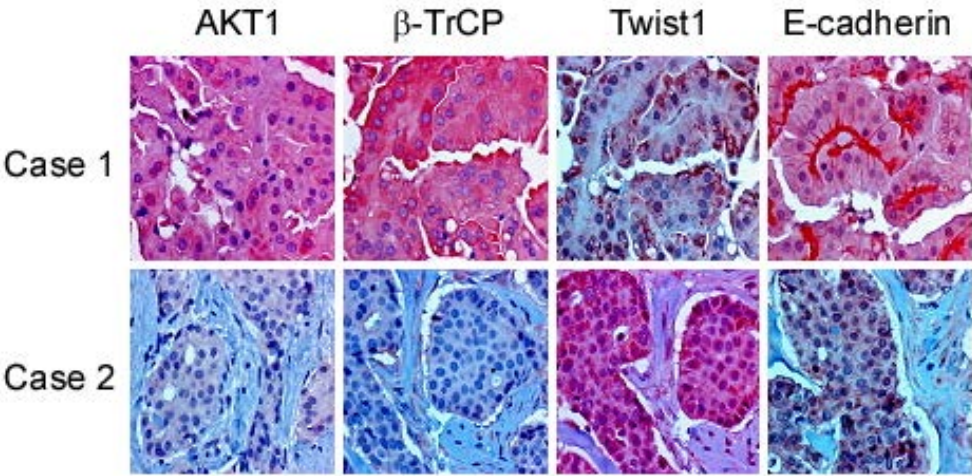

# Supplementary Figure S9

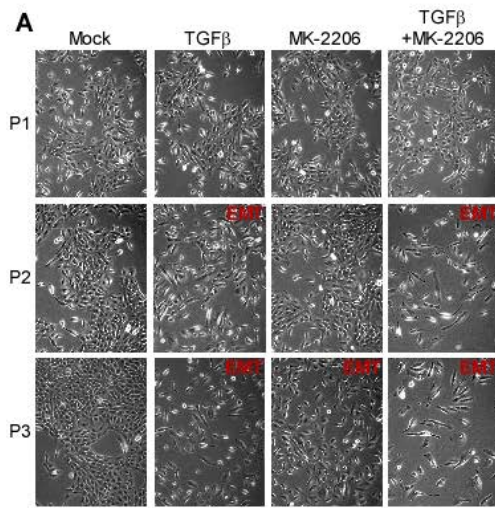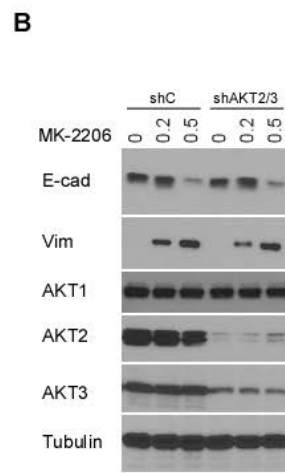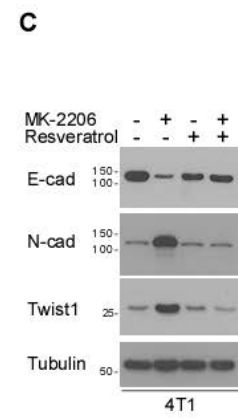

Supplement: NIHMS748462-supplement-3.pdf [file NIHMS748462-supplement-3.pdf]
